# Supplementary material
Source: HighWire-hosted journal article supplement (https://bmjopen.bmj.com/content/7/11/e018467)
Supplement: inline-supplementary-material-2 [file inline-supplementary-material-2.pdf]

## Supplementary file 2: Interview guide

Hi (Name)

Thanks so much for agreeing to talk to me about research reporting today. I just want to check – have you read the information sheet? Is there anything that is unclear? As noted in the sheet, I will record our conversation – are you fine with that? Please note that all reporting is anonymous and you will not be identified in any way, and you are free to stop the interview at any time.

Another thing I want to mention is that we invited you to complete the survey because you are an author on a Cochrane review, but I would like you to think about any research publication – not just Cochrane reviews – during our conversation.

Let's start then. You work at the (*institution as provided by participant*), right? What is your job there?

Let's talk about the survey that you completed a few weeks ago. What did you think about the situations we gave, did any seem familiar? What do you remember?

Some of the scenarios were about being an author on a paper. Have you come across any issues here yourself? What happened?

- *Prompts depending on answer:*
  - What about omitting an author that has contributed sufficiently to the research paper?
  - What about adding an author that has not made a big enough contribution to the research paper?
- Have you experienced something like this?
- How do you decide on authorship at your institution?
- Are there any guidelines about authorship at your institution? Are these being followed?

Some of the scenarios were about people copying other people's work, often called plagiarism.

What do you think about this? What do you understand by it? What do you think are the main problems with plagiarism?

- *Prompts depending on answer:*
  - What about translating a text into another language?
  - What about copying a text from another paper?
  - What about using someone else's idea?
- Do you have guidelines on plagiarism at your institution?

There were also scenarios about conflict of interest. How do you understand conflict of interest? Why do you think this is a problem?

- *Prompts depending on answer:*
  - What about being paid by a drug company for a consultation not related to the research project?
  - What about conflicts of interest that do not involve money?
- How do you deal with these competing interests at your institution and how are they reported in a paper?

What about other problems that we did not address in the survey, like making-up or manipulating data - Are you aware of any other poor practices happening at your institution?

Why do you think people engage in this bad practice?

What do you think can be done to prevent this behaviour?

Any other comments or questions?
