# Supplementary material
Source: HighWire-hosted journal article supplement (https://bmjopen.bmj.com/content/7/11/e018467)
Supplement: inline-supplementary-material-3 [file inline-supplementary-material-3.pdf]

### Supplementary file 3: Final list and categories of codes

| Poor practices happening at institutions                    |
|-------------------------------------------------------------|
| Adding authors that have not contributed substantially      |
| Being added as an author when not contributed substantially |
| Being omitted                                               |
| Omitting authors that have contributed                      |
| Ranking of authors not according to contributions           |
| Change in author team                                       |
| Changing author names on published papers                   |
| Using ideas without acknowledging their origin              |
| Detection of plagiarism when doing systematic reviews       |
| Students using existing projects                            |
| Academic Col                                                |
| Non-financial Col                                           |
| Data dredging                                               |
| Data fabrication                                            |
| Duplicate publication in different languages                |
| Influence of sponsor                                        |
| Non-reporting of results                                    |
| Inaccurate reporting to public                              |
| Data manipulation                                           |
| What was done when irregularity was detected?               |
| Discussions within author team                              |
| Nothing was done                                            |
| Formal complaint                                            |
| Punishment                                                  |
| Discussions within author team                              |
| Decline further participation                               |
| Channels for complaints                                     |
| Feelings associated with experience                         |
| Upset about what happened                                   |
| Feeling powerless                                           |
| Unfair process                                              |
| Frustration                                                 |
| Did not care                                                |
| Not sure how to handle situation                            |
| Insecurity                                                  |
| Discomfort                                                  |
| Concerned                                                   |
| Factors influencing practices/reasons for poor practices    |
| Author team dynamics                                        |
| Academic (personal) gain                                    |
| Payment for assistance                                      |
| Endorsement                                                 |

|                                                         |
|---------------------------------------------------------|
| Personal relationships                                  |
| Professional relationships                              |
| Publication fees                                        |
| Lack of knowledge and skills                            |
| Direct research environment (research team)             |
| Institutions                                            |
| Hierarchies within institutions                         |
| Requirements for promotion                              |
| Personal values                                         |
| Lack of resources                                       |
| Journal requirements                                    |
| Guidelines                                              |
| Cultural environment                                    |
| Lack of time for research                               |
| Lack of funding                                         |
| Lack of interest                                        |
| Journals                                                |
| Providing a service                                     |
| Academic status                                         |
| Researcher                                              |
| Funders                                                 |
| Who is an author?                                       |
| Challenges with authorship criteria                     |
| Timing of authorship discussions                        |
| What contribution warrants authorship? (ICMJE criteria) |
| Other criteria that warrant authorship                  |
| Guidelines                                              |
| Arbitrary                                               |
| Role of authors                                         |
| What is plagiarism?                                     |
| Various degrees of plagiarism                           |
| Not acknowledging origin of ideas                       |
| Using text without acknowledging source                 |
| Not sure about meaning                                  |
| Translating text                                        |
| Challenges related to plagiarism                        |
| What are conflicts of interest?                         |
| Levels of COI                                           |
| Relationships with industry                             |
| Academic COI                                            |
| Difficult to understand COI                             |
| Guideline panels                                        |
| Professional relationships                              |
| Personal relationships                                  |
| Anything that influences research                       |
| Research misconduct in general                          |

|                                                    |
|----------------------------------------------------|
| Levels of misconduct                               |
| Complex issue                                      |
| Crime                                              |
| Global issues                                      |
| <b>Implications of poor practices</b>              |
| Affects organizational culture                     |
| Image of institution                               |
| Bias study results                                 |
| Impact on researcher                               |
| Mistrust of study results                          |
| Impact on patients                                 |
| Far-reaching consequences                          |
| <b>Dealing with poor practices</b>                 |
| Forgive                                            |
| Responsibilities of researcher                     |
| Challenging                                        |
| Institutional guidelines                           |
| Institutional support                              |
| Disciplinary action                                |
| Using Technology                                   |
| Declaring COI                                      |
| Decline participation                              |
| Relationships with industry                        |
| Need universal system                              |
| Learn from others                                  |
| <b>Promoting good practices</b>                    |
| Training                                           |
| Research team                                      |
| Role-modelling                                     |
| International collaborations                       |
| Organizational culture                             |
| Creating awareness                                 |
| Auditing research                                  |
| Institutional structures and channels              |
| Rewards and punishments                            |
| Funding                                            |
| Clear and accessible guidelines for all staff      |
| Realistic research projects                        |
| <b>Perceptions of prevalence of poor practices</b> |
| Adding authors very common                         |
| Adding not common                                  |
| Omitting authors relevant to clinical trials       |
| Links with Pharmaceutical industries               |
| Plagiarism does occur                              |
| Relevant topic                                     |
| Common issue but not always overt                  |

| <b>Attitudes of researchers</b>           |
|-------------------------------------------|
| <b>Criteria restrictive</b>               |
| <b>Arrogance</b>                          |
| <b>Hopeless?</b>                          |
| <b>Not tolerated</b>                      |
| <b>Difficult to be 100% honest</b>        |
| <b>Accountability</b>                     |
| <b>Aware of research integrity issues</b> |
