# Supplementary material
Source: HighWire-hosted journal article supplement (https://bmjopen.bmj.com/content/7/11/e018467)
Supplement: inline-supplementary-material-4 [file inline-supplementary-material-4.pdf]

## Supplementary file 4: Detailed survey responses

Table 1: Researchers' perceptions of irresponsible research reporting practices

| Health research reporting practice<br>Total n=198                                                      | This is acceptable | This is not best practice, but it does not really matter, as it doesn't affect the science | This is unacceptable |
|--------------------------------------------------------------------------------------------------------|--------------------|--------------------------------------------------------------------------------------------|----------------------|
|                                                                                                        | n (%)              | n (%)                                                                                      | n (%)                |
| <b>Authorship practices</b>                                                                            |                    |                                                                                            |                      |
| Adding the head of department who has not contributed sufficiently                                     | 26 (13)            | 43 (22)                                                                                    | 129 (65)             |
| Adding an expert in the field who has not contributed sufficiently to the research                     | 21 (11)            | 43 (22)                                                                                    | 134 (68)             |
| Acknowledging a biostatistician for assistance with data analysis (as opposed to listing as an author) | 127 (64)           | 5 (3)                                                                                      | 66 (33)              |
| Omitting an author who has contributed substantially to the research                                   | 1 (0.5)            | 2 (1)                                                                                      | 195 (98)             |
| <b>Redundant publication</b>                                                                           |                    |                                                                                            |                      |
| Text-recycling (using one's own work from a previous publication in another)                           | 34 (17)            | 23 (12)                                                                                    | 141 (71)             |
| <b>Plagiarism</b>                                                                                      |                    |                                                                                            |                      |
| Translating a text without acknowledging the original source                                           | 3 (2)              | 6 (3)                                                                                      | 189 (95)             |
| Copying an idea without acknowledgement of the original source                                         | 5 (3)              | 15 (8)                                                                                     | 178 (90)             |
| <b>Conflict of interest</b>                                                                            |                    |                                                                                            |                      |
| Not declaring previous financial reimbursement from a company involved in a research project           | 13 (7)             | 12 (6)                                                                                     | 173 (87)             |
| Not declaring the wife's link to a company involved in a research project                              | 26 (13)            | 21 (11)                                                                                    | 151 (76)             |

Table 2: Researchers' awareness of occurrence of irresponsible research reporting practices

| Health reporting practice<br>Total n=198                                                               | Have<br>done this<br>before | Have not done this<br>but <i>are</i> aware of<br>other people<br>doing it | Have not done this<br>and are <i>not</i> aware<br>of other people<br>doing it |
|--------------------------------------------------------------------------------------------------------|-----------------------------|---------------------------------------------------------------------------|-------------------------------------------------------------------------------|
|                                                                                                        | n (%)                       | n (%)                                                                     | n (%)                                                                         |
| <b>Authorship practices</b>                                                                            |                             |                                                                           |                                                                               |
| Adding the head of department who has not contributed sufficiently                                     | 48 (24)                     | 113 (57)                                                                  | 37 (19)                                                                       |
| Adding an expert in the field who has not contributed sufficiently to the research                     | 42 (21)                     | 103 (52)                                                                  | 53 (27)                                                                       |
| Acknowledging a biostatistician for assistance with data analysis (as opposed to listing as an author) | 103 (52)                    | 60 (30)                                                                   | 35 (18)                                                                       |
| Omitting an author who has contributed substantially to the research                                   | 4 (2)                       | 83 (42)                                                                   | 111 (56)                                                                      |
| <b>Redundant publication</b>                                                                           |                             |                                                                           |                                                                               |
| Text-recycling (using one's own work from a previous publication in another)                           | 22 (11)                     | 95 (48)                                                                   | 80 (40)                                                                       |
| <b>Plagiarism</b>                                                                                      |                             |                                                                           |                                                                               |
| Translating a text without acknowledging the original source)                                          | 4 (2)                       | 73 (37)                                                                   | 121 (61)                                                                      |
| Copying an idea without acknowledgement                                                                | 5 (3)                       | 84 (42)                                                                   | 109 (55)                                                                      |
| <b>Conflict of interest</b>                                                                            |                             |                                                                           |                                                                               |
| Not declaring previous financial reimbursement from a company involved in a research project)          | 5 (3)                       | 85 (43)                                                                   | 108 (55)                                                                      |
| Not declaring the wife's link to a company involved in a research project                              | 3 (2)                       | 58 (29)                                                                   | 137 (69)                                                                      |

Table 3: Occurrence of irresponsible health research reporting practices in respondents' current institution

| Health reporting practice<br>Total n=198                                                               | Happens most of<br>the time | Happens<br>occasionally | Happens rarely | Never happens | Don't know |
|--------------------------------------------------------------------------------------------------------|-----------------------------|-------------------------|----------------|---------------|------------|
|                                                                                                        | n (%)                       | n (%)                   | n (%)          | n (%)         | n (%)      |
| <b>Authorship practices</b>                                                                            |                             |                         |                |               |            |
| Adding the head of department who has not contributed sufficiently                                     | 26 (13)                     | 78 (39)                 | 49 (25)        | 35 (18)       | 10 (5)     |
| Adding an expert in the field who has not contributed sufficiently to the research                     | 26 (13)                     | 65 (33)                 | 49 (25)        | 51 (26)       | 7 (4)      |
| Acknowledging a biostatistician for assistance with data analysis (as opposed to listing as an author) | 70 (35)                     | 62 (31)                 | 34 (17)        | 22 (11)       | 10 (5)     |
| Omitting an author who has contributed substantially to the research                                   | 2 (1)                       | 28 (14)                 | 51 (26)        | 103 (52)      | 14 (7)     |
| <b>Redundant publication</b>                                                                           |                             |                         |                |               |            |
| Text-recycling (using one's own work from a previous publication in another)                           | 16 (8)                      | 50 (25)                 | 52 (26)        | 56 (28)       | 24 (12)    |
| <b>Plagiarism</b>                                                                                      |                             |                         |                |               |            |
| Translating a text without acknowledging the original source                                           | 3 (2)                       | 24 (12)                 | 47 (24)        | 101 (52)      | 23 (12)    |
| Copying an idea without acknowledgement                                                                | 2 (1)                       | 24 (12)                 | 59 (30)        | 91 (46)       | 22 (11)    |
| <b>Conflict of interest</b>                                                                            |                             |                         |                |               |            |
| Not declaring previous financial reimbursement from a company involved in a research project           | 3 (2)                       | 30 (15)                 | 47 (24)        | 95 (48)       | 23 (12)    |
| Not declaring the wife's link to a company involved in a research project                              | 1 (0.5)                     | 14 (7)                  | 41 (21)        | 110 (56)      | 32 (16)    |
