# Supplementary material
Source: HighWire-hosted journal article supplement (https://bmjopen.bmj.com/content/7/11/e018467)
Supplement: inline-supplementary-material-5 [file inline-supplementary-material-5.pdf]

## Supplementary file 5: Survey results per region

| Health research reporting practice per region<br>Total n=198                                                  | Perception: Acceptable or does not really matter | Behaviour: Have done this themselves | Occurrence at institution: This happens |
|---------------------------------------------------------------------------------------------------------------|--------------------------------------------------|--------------------------------------|-----------------------------------------|
| <b>Adding the head of department who has not contributed sufficiently</b>                                     |                                                  |                                      |                                         |
| Sub-Saharan Africa (n=48)                                                                                     | 6 (13)                                           | 5 (10)                               | 32 (67)                                 |
| Latin America (n=52)                                                                                          | 16 (31)*                                         | 14 (27)                              | 40 (77)                                 |
| South and South East Asia (n=44)                                                                              | 16 (36)*                                         | 10 (23)                              | 30 (68)                                 |
| East Asia (n=36)                                                                                              | 24 (67)*                                         | 12 (33)                              | 36 (100)                                |
| Other (n=18)                                                                                                  | 7 (39)*                                          | 3 (17)                               | 15 (83)                                 |
| Difference between regions                                                                                    | p<0.001                                          | p=0.178                              | p=0.003                                 |
| <b>Adding an expert in the field who has not contributed sufficiently to the research</b>                     |                                                  |                                      |                                         |
| Sub-Saharan Africa (n=48)                                                                                     | 10 (21)                                          | 7 (15)                               | 25 (52)                                 |
| Latin America (n=52)                                                                                          | 16 (31)                                          | 14 (27)                              | 39 (75)*                                |
| South and South East Asia (n=44)                                                                              | 17 (39)                                          | 5 (11)                               | 29 (66)                                 |
| East Asia (n=36)                                                                                              | 17 (47)                                          | 11 (31)                              | 34 (94)*                                |
| Other (n=18)                                                                                                  | 4 (22)                                           | 5 (28)                               | 13 (72)                                 |
| Difference between regions                                                                                    | p=0.083                                          | p=0.109                              | p=0.001                                 |
| <b>Acknowledging a biostatistician for assistance with data analysis (as opposed to listing as an author)</b> |                                                  |                                      |                                         |
| Sub-Saharan Africa (n=48)                                                                                     | 29 (60)                                          | 21 (44)                              | 35 (73)                                 |
| Latin America (n=52)                                                                                          | 37 (71)                                          | 31 (60)                              | 45 (87)                                 |
| South and South East Asia (n=44)                                                                              | 33 (75)                                          | 25 (57)                              | 39 (89)                                 |
| East Asia (n=36)                                                                                              | 19 (53)                                          | 16 (44)                              | 32 (89)                                 |
| Other (n=18)                                                                                                  | 14 (78)                                          | 10 (56)                              | 15 (83)                                 |
| Difference between regions                                                                                    | p=0.146                                          | p=0.211                              | p=0.204                                 |
| <b>Omitting an author who has contributed substantially to the research</b>                                   |                                                  |                                      |                                         |

|                                                                                     |          |         |          |
|-------------------------------------------------------------------------------------|----------|---------|----------|
| Sub-Saharan Africa (n=48)                                                           | 1 (2)    | 0 (0)   | 15 (31)  |
| Latin America (n=52)                                                                | 0 (0)    | 3 (6)   | 20 (38)  |
| South and South East Asia (n=44)                                                    | 1 (2)    | 0 (0)   | 17 (39)  |
| East Asia (n=36)                                                                    | 1 (3)    | 1 (3)   | 21 (58)  |
| Other (n=18)                                                                        | 0 (0)    | 0 (0)   | 8 (44)   |
| Difference between regions                                                          | p=0.784  | p=0.546 | p=0.153  |
| <b>Text-recycling (using one's own work from a previous publication in another)</b> |          |         |          |
| Sub-Saharan Africa (n=48)                                                           | 7 (15)   | 2 (4)   | 18 (38)  |
| Latin America (n=52)                                                                | 27 (52)* | 10 (19) | 35 (67)* |
| South and South East Asia (n=44)                                                    | 9 (20)   | 4 (9)   | 26 (59)* |
| East Asia (n=36)                                                                    | 13 (36)* | 4 (11)  | 29 (81)* |
| Other (n=18)                                                                        | 1 (6)    | 2 (11)  | 10 (56)  |
| Difference between regions                                                          | p<0.001  | p=0.015 | p=0.001  |
| <b>Translating a text without acknowledging the original source</b>                 |          |         |          |
| Sub-Saharan Africa (n=48)                                                           | 1 (2)    | 1 (2)   | 8 (17)   |
| Latin America (n=52)                                                                | 4 (8)    | 1 (2)   | 20 (38)* |
| South and South East Asia (n=44)                                                    | 3 (7)    | 0 (0)   | 14 (32)  |
| East Asia (n=36)                                                                    | 1 (3)    | 1 (3)   | 23 (64)* |
| Other (n=18)                                                                        | 0 (0)    | 1 (6)   | 9 (50)*  |
| Difference between regions                                                          | p=0.478  | p=0.105 | p<0.001  |
| <b>Copying an idea without acknowledgement of the original source</b>               |          |         |          |
| Sub-Saharan Africa (n=48)                                                           | 0 (0)    | 0 (0)   | 9 (19)   |
| Latin America (n=52)                                                                | 6 (12)   | 2 (4)   | 25 (48)* |
| South and South East Asia (n=44)                                                    | 4 (9)    | 0 (0)   | 18 (41)* |
| East Asia (n=36)                                                                    | 8 (22)   | 3 (8)   | 25 (69)* |
| Other (n=18)                                                                        | 2 (11)   | 0 (0)   | 8 (44)*  |

|                                                                                                     |          |         |          |
|-----------------------------------------------------------------------------------------------------|----------|---------|----------|
| Difference between regions                                                                          | p=0.022  | p=0.013 | p<0.001  |
| <b>Not declaring previous financial reimbursement from a company involved in a research project</b> |          |         |          |
| Sub-Saharan Africa (n=48)                                                                           | 2 (4)    | 0 (0)   | 11 (23)  |
| Latin America (n=52)                                                                                | 4 (8)    | 1 (2)   | 21 (40)  |
| South and South East Asia (n=44)                                                                    | 3 (7)    | 2 (5)   | 18 (41)  |
| East Asia (n=36)                                                                                    | 11 (31)* | 1 (3)   | 22 (61)* |
| Other (n=18)                                                                                        | 5 (28)*  | 1 (5)   | 8 (44)   |
| Difference between regions                                                                          | p=0.001  | p=0.02  | p=0.013  |
| <b>Not declaring a spouse's link to a company involved in a research project</b>                    |          |         |          |
| Sub-Saharan Africa (n=48)                                                                           | 6 (13)   | 0 (0)   | 6 (13)   |
| Latin America (n=52)                                                                                | 10 (19)  | 1 (2)   | 15 (29)  |
| South and South East Asia (n=44)                                                                    | 12 (27)  | 0 (0)   | 11 (25)  |
| East Asia (n=36)                                                                                    | 14 (39)* | 2 (6)   | 19 (53)* |
| Other (n=18)                                                                                        | 5 (28)   | 0 (0)   | 5 (28)   |
| Difference between regions                                                                          | p=0.062  | p=0.043 | p=0.002  |

\*Indicates significant difference compared to Sub-Saharan Africa
